# Supplementary material for: Assessing the impact of mRNA vaccination in chronic inflammatory murine model
Source: Springer Nature journal article supplement (doi:10.1038/s41541-024-00825-z), 2024-02-15
Supplement: 41541_2024_825_MOESM1_ESM.pdf [file 41541_2024_825_MOESM1_ESM.pdf]

1 **SUPPLEMENTARY TABLE, FIGURES**

2

3 **Supplementary Table 1. Sequences of the primers used in the study**

| Tissue | Gene              | Forward (5'-3')          | Reverse (5'-3')            |
|--------|-------------------|--------------------------|----------------------------|
| Heart  | IL-1 $\beta$      | TTGACGGACCCCAAAGAGTG     | ACTCCTGTACTCGTGGAAGA       |
|        | IL-6              | GTACTIONCAGAAGACCAGAGG   | TGCTGGTGACAACCACGGCC       |
|        | TNF- $\alpha$     | TTGACCTCAGCGCTGAGTTG     | CCTGTAGCCACGTCGTAGC        |
|        | CD4               | GTTCAGGACAGCGACTTCTGGA   | GAAGGAGAACTCCGCTGACTCT     |
|        | CD8               | ACTACCAAGCCAGTGCTGCGAA   | ATCACAGGCGAAGTCCAATCCG     |
|        | MCP-1             | ACCTGGATCGGAACCAAATG     | CCTTAGGGCAGATGCAGTTTTAA    |
|        | NPPA              | TACAGTGCAGGTGTCCAACACAG  | TGCTTCCTCAGTCTGCTCACTC     |
|        | Myh7              | GCTGAAAGCAGAAAGAGATTATC  | TGGAGTTCTTCTTCTGAGG        |
|        | ANP               | TCGTCTTGGCCTTTTGGCT      | TCCAGGTGGTCTAGCAGGTTCT     |
|        | GAPDH             | ATCAACGACCCCTTCATTGACC   | CCAGTAGACTCCACGACATACTCAGC |
| Muscle | Adgre1            | GCTGCACCTCTGTGCCTTT      | CAGGTATGCCATGATGCTTG       |
|        | CD80              | CGCAACCACACCATTAAG       | GATGACGACGACTGTTATTAC      |
|        | IL-1 $\beta$      | GCAACTGTTCTGAACTCAACT    | ATCTTTTGGGGTCCGTCAACT      |
|        | CD206             | GAGTGGCAGGTGGCTTATG      | ATTTGGGTTCCAGGAGTTGTTGT    |
|        | Myh7              | ACCAGGCCCTTTGACCTCAAGAAA | TCTTGTGCAACTTGGGTGGGTTCT   |
|        | MyoD              | AGACTTCTATGATGACCCGTGTT  | TCAGCGTTGGTGGTCTTGC        |
|        | IGF- II           | CGCTTCAGTTTGTCTGTTCCG    | AGGTAGACACGTCCCTCTCG       |
|        | GAPDH             | TCCACTCTTCCACCTTCGA      | CAGGAAATGAGCTTGACAAAGTTG   |
|        | ND1               | CTAGCAGAAACAAACCGGGC     | CCGGCTGCGTATTCTACGTT       |
|        | HK2               | GCCAGCCTCTCCTGATTTTAGTGT | GGGAACACAAAAGACCTCTTCTGG   |
|        | PGC-1 $\alpha$    | CGGAAATCATATCCAACCAG     | TGAGGACCGCTAGCAAGTTTG      |
|        | Opa1              | CGACTTTGCCGAGGATAGCTT    | CGTTGTGAACACACTGCTCTTG     |
|        | Drp1              | CCTCAGATCGTCGTAGTGGGA    | GTTCTCTGGGAAGAAGGTCC       |
|        | Mfn1              | AACTTGATCGAATAGCATCCGAG  | GCATTGCATTGATGACAGAGC      |
|        | Mfn2              | CTGGGGACCGGATCTTCTTC     | CTGCCTCTCGAAATTCTGAAACT    |
|        | TNNC1             | GCGGTAGAACAGTTGACAGAG    | CCAGCTCCTTGGTGCTGAT        |
|        | TNNC2             | GAGGCCAGGTCTTACCTCAG     | GGTGCCCAACTCTTTAACGCT      |
|        | TNNI1             | ATGCCGGAAGTTGAGAGGAAA    | TCCGAGAGGTAACGCACCTT       |
| TNNI2  | CGGAGGGTGCATGTCTG | CAGGTCCCGTTCCTTCTCA      |                            |

4 Abbreviations: IL-1 $\beta$ , Interleukin 1 beta; IL-6, Interleukin 6; TNF- $\alpha$ , tumor necrosis factor-alpha; MCP-1,  
5 monocyte chemoattractant protein-1; monocyte chemoattractant protein-1; NPPA, natriuretic peptide A; Myh7,  
6 myosin heavy chain 7; ANP, atrial natriuretic peptide; GAPDH, glyceraldehyde-3-phosphoate dehydrogenase;  
7 MyoD, Myogenic Differentiation 1; IGF- II, Insulin Like Growth Factor 2; ND1, NADH dehydrogenase subunit  
8 1; HK2, hexokinase 2; PGC-1 $\alpha$ , Peroxisome Proliferator-Activated Receptor Gamma Coactivator 1-Alpha; Opa1,  
9 Optic atrophy protein 1; Drp1, Dynamin-Related Protein 1; Mfn1, Mitofusin 1; Mfn2, Mitofusin 2; TNNC1,  
10 Troponin C Type 1; TNNC2, Troponin C Type 2; TNNI1, Troponin I1; TNNI2, Troponin I2

11

12

a

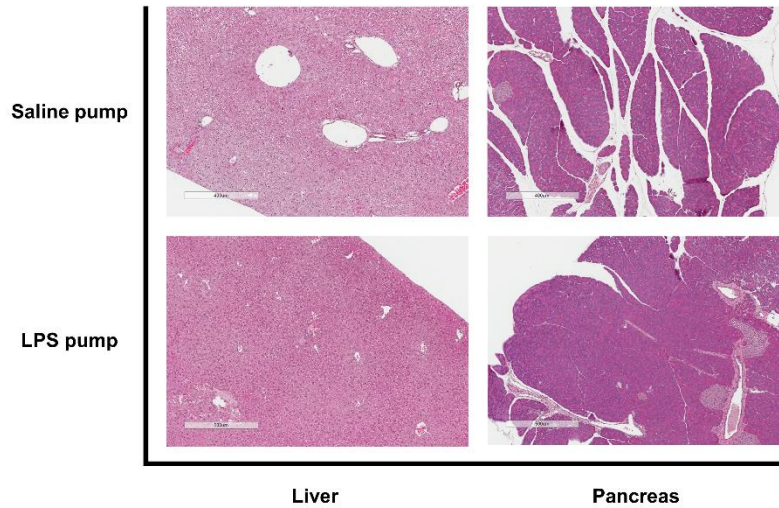

13

14 **Supplementary Figure 1. Histological findings of the liver and pancreas.** No difference  
15 was found in tissue inflammation and damage upon lipopolysaccharide pump implantation.  
16 LPS, lipopolysaccharide. Each scale bars indicate 400 μm, 500 μm (Saline pump, LPS pump).

a

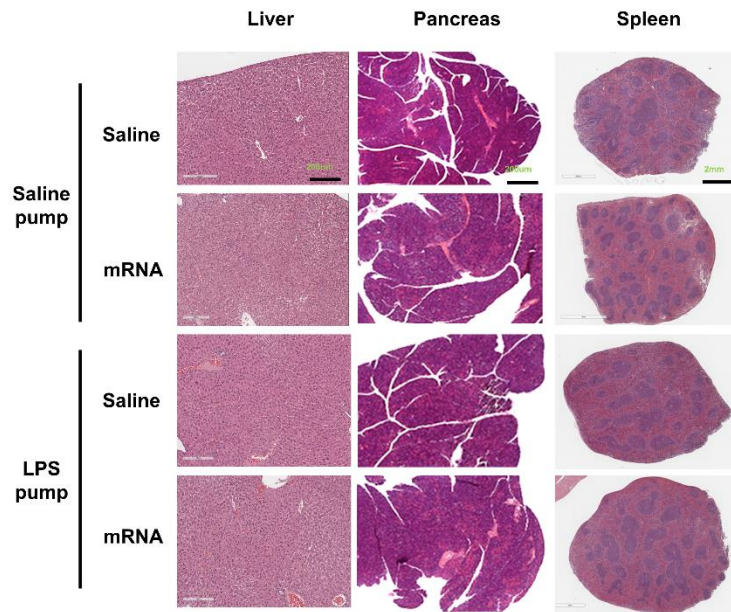

b

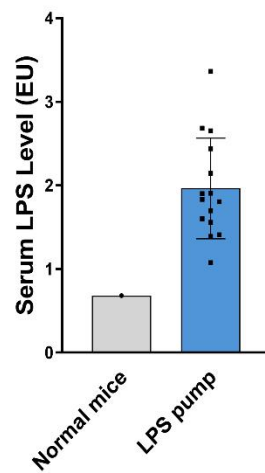

17

18 **Supplementary Figure 2.** (a) Histological findings of the liver, pancreas, and spleen. Each  
19 scale bars indicate 200 μm, 200 μm, 2 mm (Liver, pancreas, spleen). No difference was found  
20 in tissue inflammation and damage upon lipopolysaccharide (LPS) pump implantation with or

21 without mRNA vaccine administration. (b) Serum LPS levels were measured using enzyme-  
 22 linked immunosorbent assay.

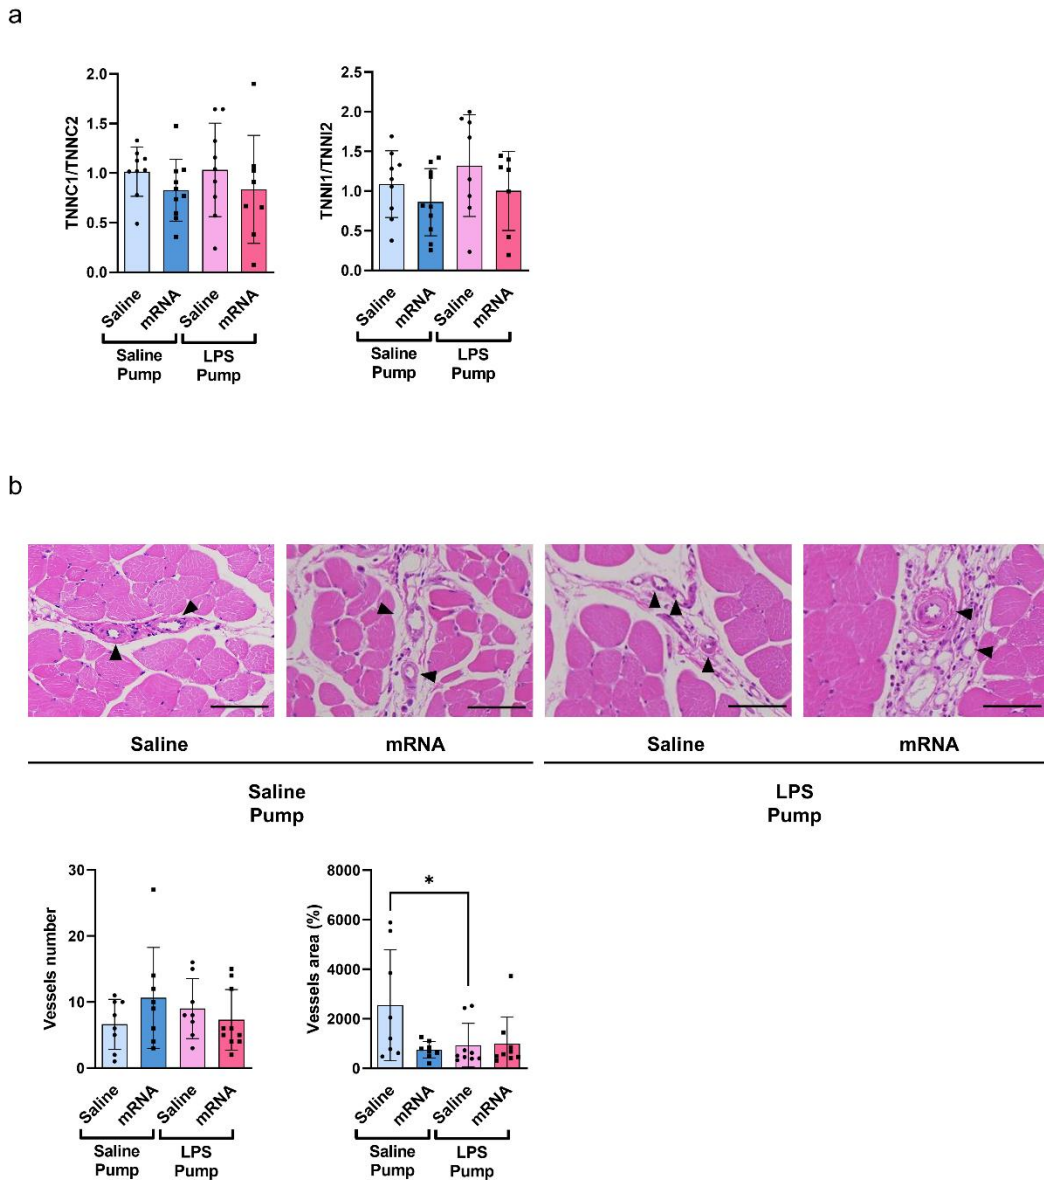

23

24 **Supplementary Figure 3. mRNA vaccines do not induce significant adverse effects in the**

25 **muscle.** (a) The quadriceps were obtained two days after administering an immunization

26 booster and were analyzed using quantitative reverse transcription PCR (n = 7–10). The

27 reference gene, mouse GAPDH, was used to normalize the target gene expression levels. (b)

28 Representative hematoxylin and eosin images of muscles from each group are shown (scale

29 bar = 60  $\mu\text{m}$ ). The vessels in the quadricep muscles were counted, and their respective areas  
30 were measured. \*P < 0.05 by a two-tailed Student's t-test. All data are presented as the mean  $\pm$   
31 standard deviation. LPS, lipopolysaccharide.

32

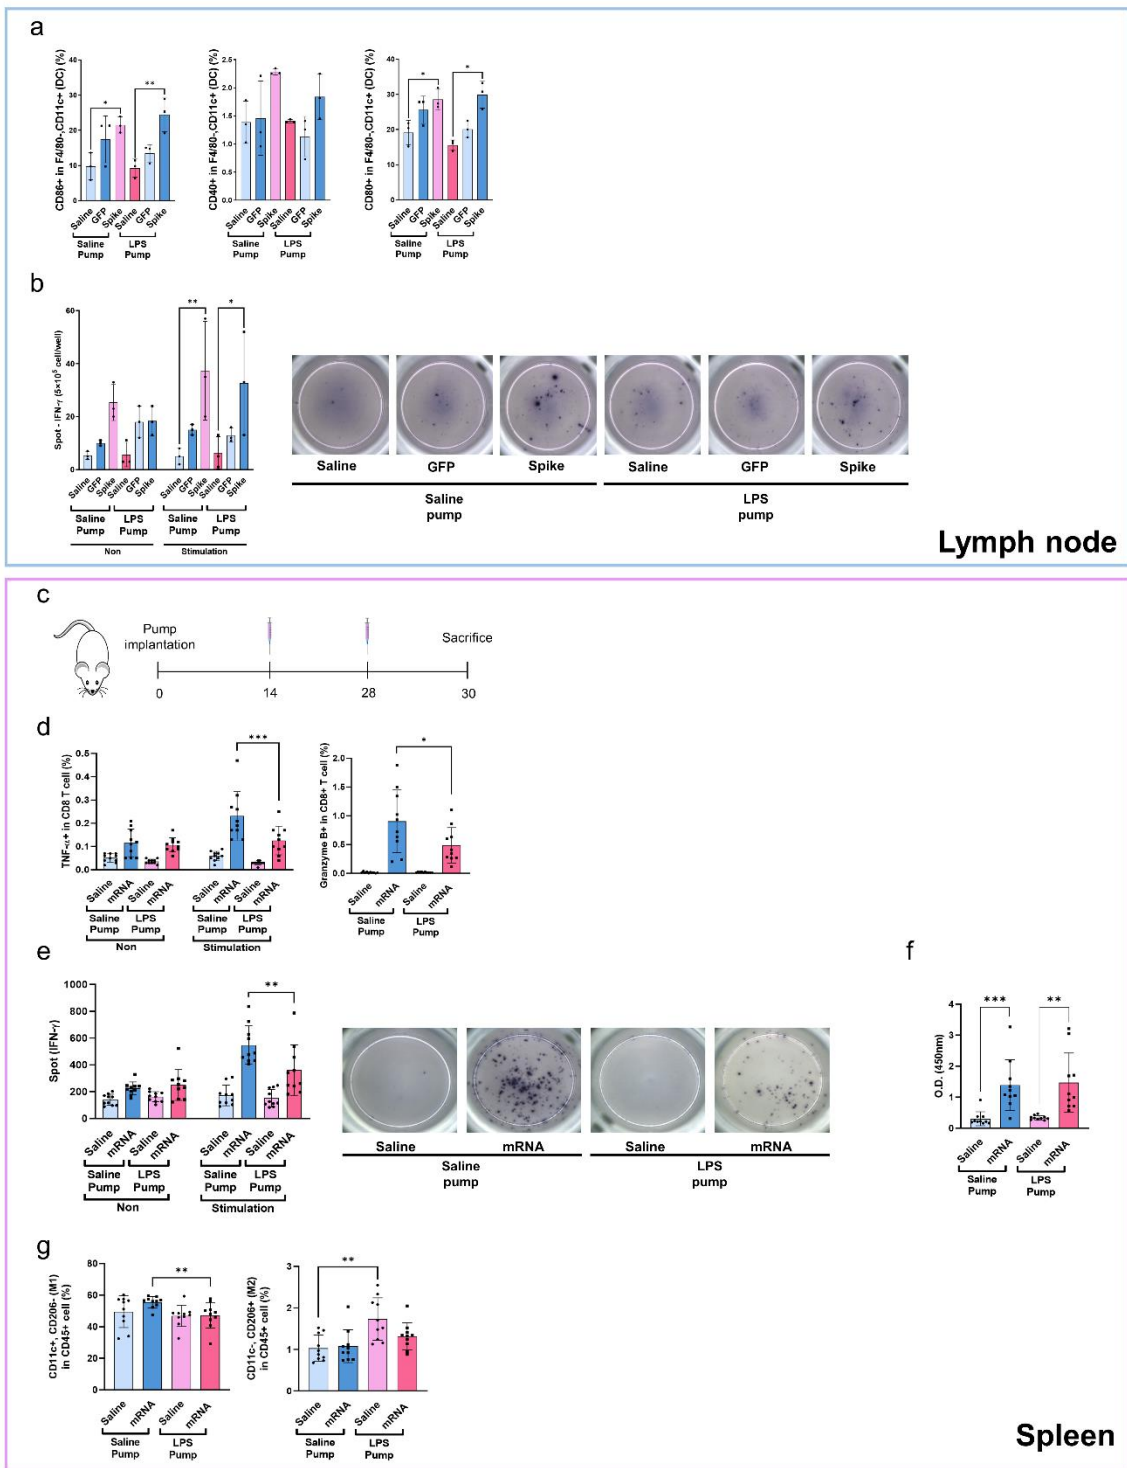

33

34 **Supplementary Figure 4. Effects of chronic inflammation on the immunogenicity of**  
 35 **mRNA vaccines.** (a) The activation levels in dendritic cells in lymph nodes were analyzed with  
 36 flow cytometry. (b) The IFN- $\gamma$  secreting cell numbers were determined using ELISpot in the

37 lymph node. (c) C57BL/6 mice were intramuscularly primed and boosted with lipid  
38 nanoparticle-formulated mRNA-Omicron (10  $\mu$ g) at 2-week intervals and were then sacrificed  
39 2 days after boosting. (d) Percentages of tumor necrosis factor-alpha- and granzyme B-  
40 producing CD4<sup>+</sup> and CD8<sup>+</sup> T cells in the spleen were assessed using flow cytometry. (e)  
41 Enzyme-linked immunospot (ELISpot) assay for interferon-gamma (IFN- $\gamma$ ) produces  
42 splenocyte activity. Splenocytes were stimulated for 2 days with/without Omicron-specific T-  
43 cell peptide. The IFN- $\gamma$  secreting cell numbers were determined using ELISpot. (f) Omicron-  
44 specific IgG levels were measured using enzyme-linked immunosorbent assay. Data are  
45 presented as mean  $\pm$  standard deviation. Statistical significance was analyzed using a two-tailed  
46 Student's *t*-test. The significance of differences between the groups is indicated on the bars: \**P*  
47 < 0.05, \*\**P* < 0.01, \*\*\**P* < 0.005 vs. the saline pump or mRNA vaccination group. IFN-  $\gamma$ ,  
48 interferon-gamma; LPS, lipopolysaccharide; TNF- $\alpha$ , tumor necrosis factor alpha. (g) The  
49 mRNA vaccine slightly induced immunosuppressive responses in the lungs of the chronic  
50 inflammation-induced mice. Data are presented as the mean  $\pm$  standard deviation. Statistical  
51 significance was analyzed using a two-tailed Student's *t*-test. The significance of differences  
52 between groups is indicated on the bars: \**P* < 0.05, \*\* *P* < 0.01, \*\*\**P* < 0.005 by a two-tailed  
53 Student's *t*-test (a, d-right, e) or two-way ANOVA (b, d-left, f, g). vs. the saline-pump or  
54 mRNA vaccination group. LPS, lipopolysaccharide.

55

56

57

58

59



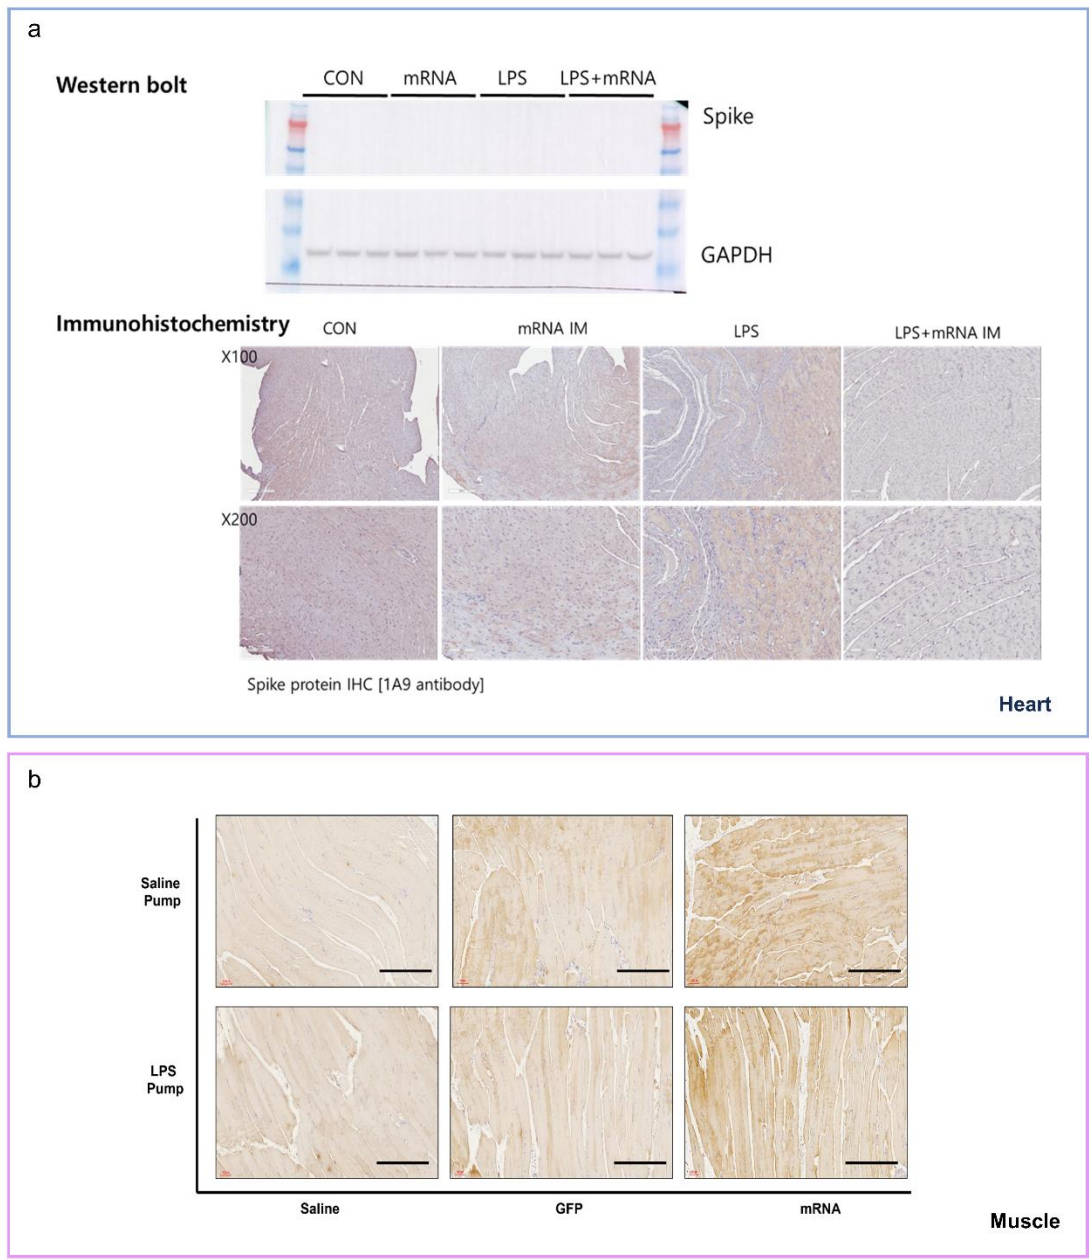

60

61 **Supplementary Figure 5. Effects of chronic inflammation on spike protein expression by**  
 62 **the mRNA vaccines.** (a) The protein was extracted from the heart tissue of mice subjected to  
 63 mRNA vaccine administration. Protein and heart sections were subjected to western blot  
 64 analysis and immunohistochemistry using the SARS-COV2 spike antibody [1A9]. (Scale bar  
 65 = 200  $\mu$ m). (b) Muscle tissue sections were subjected to immunohistochemistry.



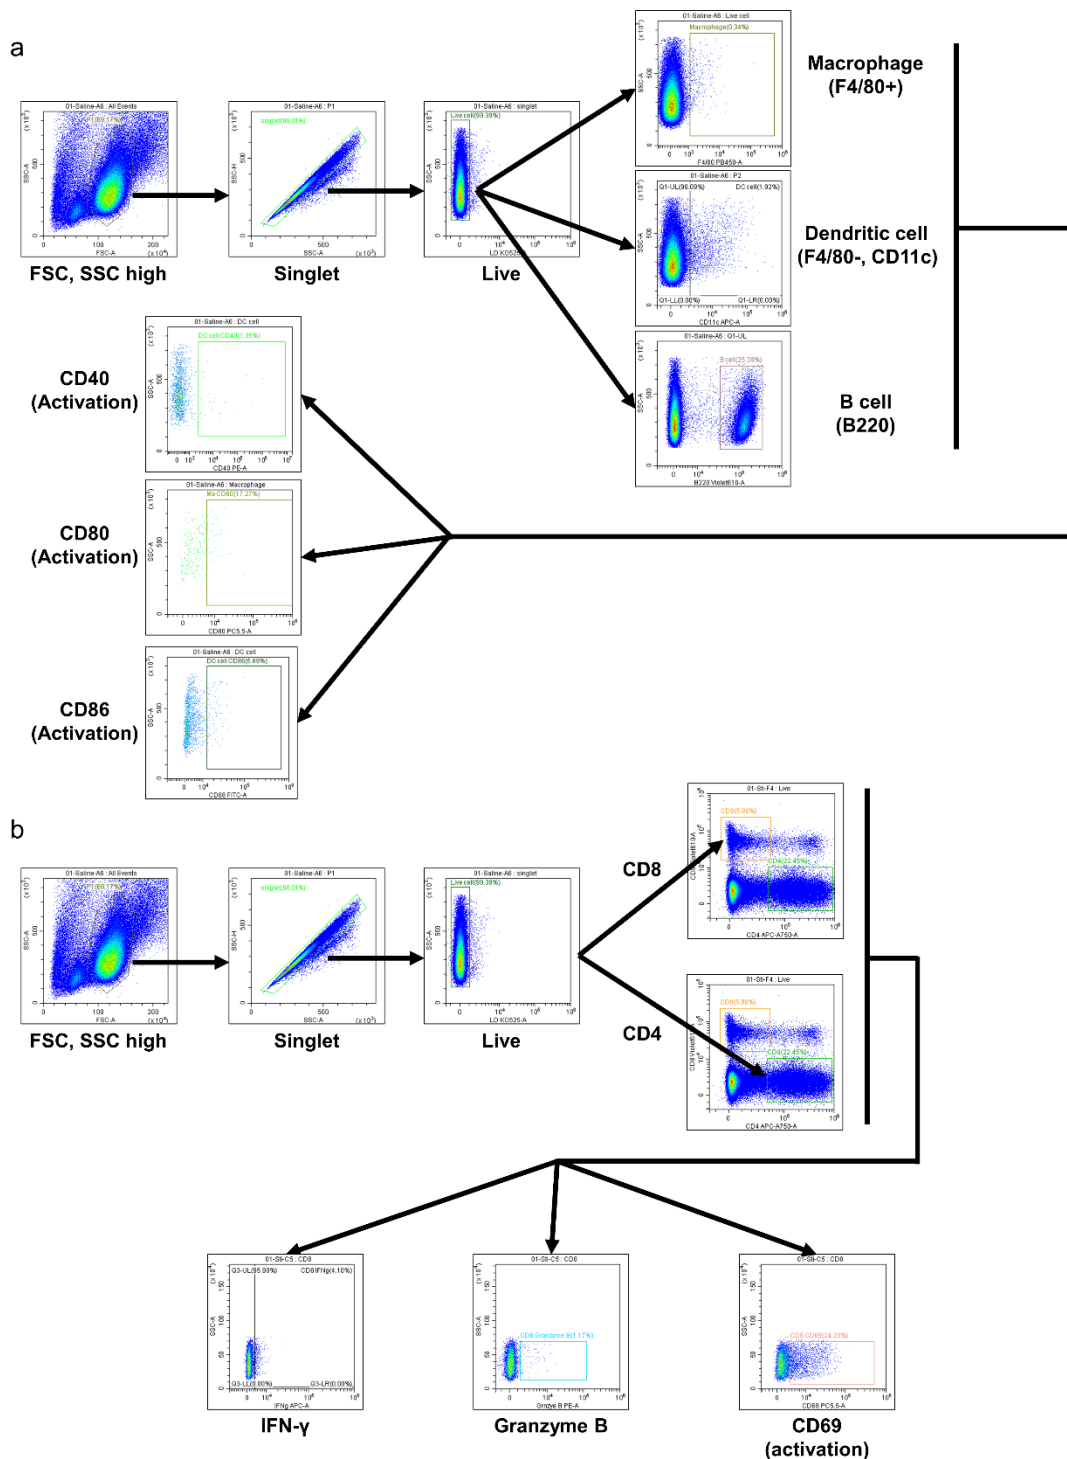

66

67 **Supplementary Figure 6.** (a) Flow cytometry plot of CD40, CD80, and CD86 (Antigen  
 68 presenting cell activation marker) positive macrophages, dendritic cells, and B cells. (b) Flow  
 69 cytometry plot of IFN- $\gamma$ , Granzyme B, and CD69 (T cell activation marker) positive CD4 and  
 70 CD8 T cells.
